# Supplementary material for: Metabolome and Transcriptome Profiling Reveal That Four Terpenoid Hormones Dominate the Growth and Development of Sanghuangporus baumii
Source: MDPI journal article supplement (doi:10.3390/jof8070648), 2022-06-21
Supplement: s1 [file s1]

## Supplementary Data

### **Metabolome and transcriptome profiling reveals that terpenoid biosynthesis dominates the growth and development of *Sanghuangporus baumii***

Zengcai Liu<sup>1</sup>, Xinyu Tong<sup>1</sup>, Ruipeng Liu<sup>1</sup>, Li Zou<sup>1,\*</sup>

<sup>1</sup>College of Forestry, Northeast Forestry University, Harbin 150040, China;

1758458181@nefu.edu.cn (Z.L.); hhxxyx@nefu.edu.cn (X.T.);

liuruipeng@nefu.edu.cn (R.L.); shyj@nefu.edu.cn (L.Z.)

\* Corresponding author: shyj@nefu.edu.cn; Tel.: +86-0451-86660457

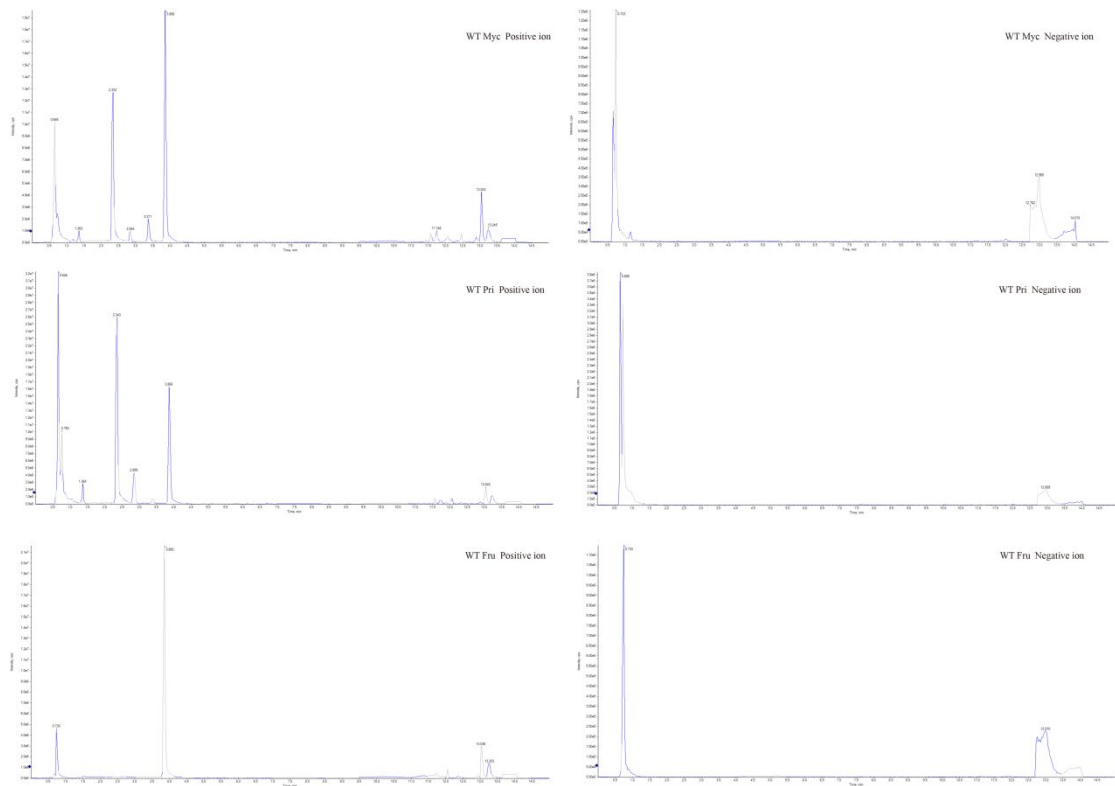

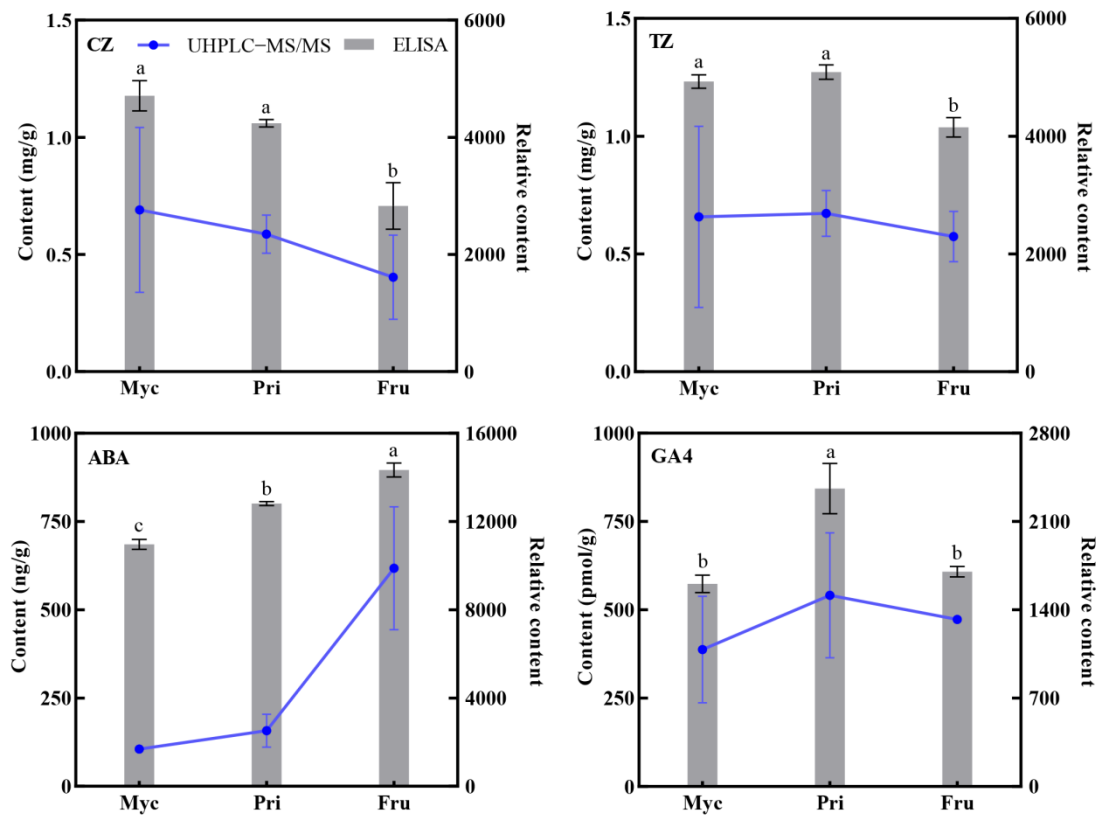

**Figure S2.** Results of ELISA and UHPLC-MS/MS determination of four terpenoid hormones.

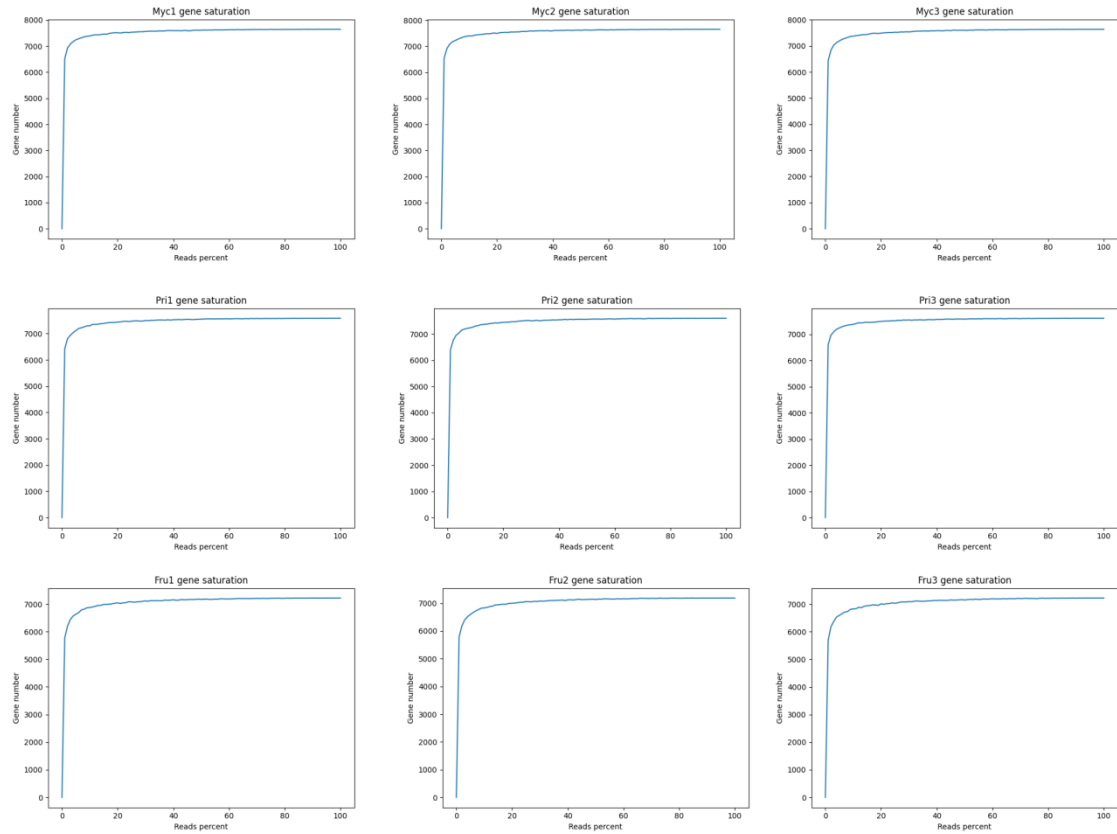

**Figure S3.** Sequencing saturation of nine samples.

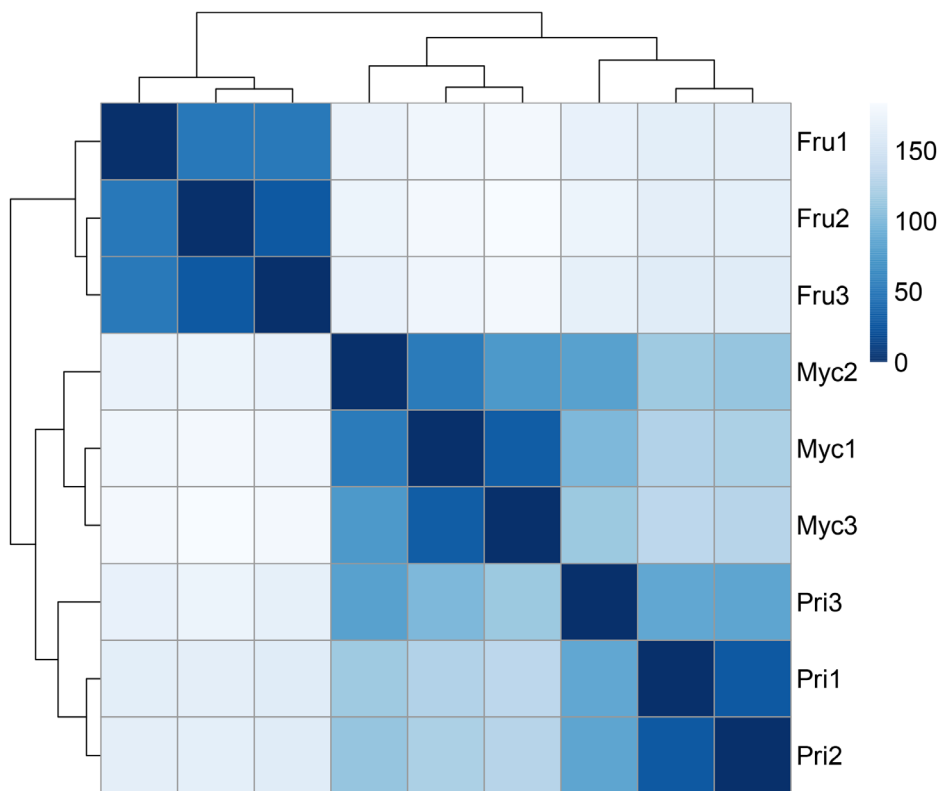

**Figure S4.** Gene expression patterns in the three development stages.



>OCB86311.1 HMGS [Sanghuangporus baumii]; >QEP49708.1 IoHMGS [Inonotus obliquus]; >XP\_007865030.1 GtHMGS [Gloeophyllum trabeum]; >KZT21597.1 NIHMGS [Neolentinus lepideus]; >KLO11524.1 SpHMGS [Schizopora paradoxa]

>OCB83928.1 HMGR [Sanghuangporus baumii]; >AEX09818.1 IoHMGR [Inonotus obliquus]; >TCD61858.1 SoHMGR [Steccherinum ochraceum]; >XP\_007363597.1 DsHMGR [Dichomitus squalens]; >RPD57004.1 LtHMGR [Lentinus tigrinus]

>OCB84761.1 MVK [Sanghuangporus baumii]; >XP\_007263021.1 FmMVK [Fomitiporia mediterranea]; >PAV16450.1 PnMVK [Pyrrhoderma noxium]; >KZT29708.1 NIMVK [Neolentinus lepideus]; >TDL25608.1 RmMVK [Rickenella mellea]

>OCB89752.1 PMK [Sanghuangporus baumii]; >XP\_007267080.1 FmPMK [Fomitiporia mediterranea]; >PAV19036.1 PnPMK [Pyrrhoderma noxium]; >KAF9012325.1 CsPMK [Cyathus striatus]; >KAF7376157.1 MsPMK [Mycena sanguinolenta];

>OCB90355.1 MVD [Sanghuangporus baumii]; >XP\_007266924.1 FmMVD [Fomitiporia mediterranea]; >QEP49711.1 IoMVD [Inonotus obliquus]; >XP\_027611478.1 ScMVD [Sparassis crispa]; >KZT71761.1 DqMVD [Daedalea quercina]

>OCB86091.1 IDI [Sanghuangporus baumii]; >QEP49712.1 IoIDI [Inonotus obliquus]; >XP\_007265734.1 FmIDI [Fomitiporia mediterranea]; >KAF8506685.1 ReIDI [Russula emetica]; >KAF9568402.1 AplIDI [Agrocybe pediades]

>OCB89018.1 GPS [Sanghuangporus baumii]; >XP\_007271176.1 FmGPS [Fomitiporia mediterranea]; >PAV22679.1 PnGPS [Pyrrhoderma noxium]; >XP\_007360550.1 DsGPS [Dichomitus squalens]; >RPD65057.1 LtGPS [Lentinus tigrinus]

>OCB92206.1 FPPS [Sanghuangporus baumii]; >XP\_007270730.1 FmFPPS [Fomitiporia mediterranea]; >KLO15136.1 SpFPPS [Schizopora paradoxa]; >TDL20808.1 RmFPPS [Rickenella mellea]; >OCH84930.1 OrFPPS [Obba rivulosa]

>OCB88125.1 GGPS [Sanghuangporus baumii]; >XP\_007262248.1 FmGGPS [Fomitiporia mediterranea]; >KLO15127.1 SpGGPS [Schizopora paradoxa]; >TDL22985.1 RmGGPS [Rickenella mellea]; >KAF9483315.1 PcGGPS [Pholiota conissans]

>OCB88085.1 TRIT1 [Sanghuangporus baumii]; >AXF50742.1 IoTRIT1 [Inonotus obliquus]; >XP\_007267488.1 FmTRIT1 [Fomitiporia mediterranea]; >KAF9001991.1 CsTRIT1 [Cyathus striatus]; >XP\_037216540.1 MiTRIT1 [Mycena indigotica]

>OCB91754.1 CYP5340A71 [Sanghuangporus baumii]; >OCB92139.1 CYP5340A72 [Sanghuangporus baumii]; >OAO90393.1 AtCYP735A1 [Sanghuangporus baumii]; >OAP14242.1 AtCYP735A2 [Sanghuangporus baumii]

>OCB90839.1 ABA4 [Sanghuangporus baumii]; >XP\_001553969.2 BcABA4 [Botrytis cinerea]

>OCB86527.1 CYP512CL1 [Sanghuangporus baumii]; >OCB86532.1 CYP512CL2 [Sanghuangporus baumii]; >OCB86528.1 CYP512CL3 [Sanghuangporus baumii]; >XP\_007261441.1 FmCYP512CL1 [Fomitiporia mediterranea]; >XP\_007261418.1 FmCYP512CL2 [Fomitiporia mediterranea]; >PAV19648.1 PnCYP512CL [Pyrrhoderma noxium]; >OCH95708.1 OrCYP512CL [Obba rivulosa]

>OCB90766.1 CYP512CM1 [Sanghuangporus baumii]; >XP\_007261732.1 FmCYP512CM [Fomitiporia mediterranea]; >PAV15339.1 PnCYP512CM [Pyrrhoderma noxium]; >KAF9225192.1 GlCYP512CM [Gyrodon lividus]; >TDL22831.1 RmCYP512CM [Rickenella mellea]

>OCB89274.1 SQS [Sanghuangporus baumii]; >AEX09819.1 IoSQS [Inonotus obliquus]; >PAV19342.1 PnSQS [Pyrrhoderma noxium]; >GAW09328.1 LeSQS [Lentinula edodes]; >TFL01662.1 PgSQS [Pterula gracilis]

>OCB87673.1 SE [Sanghuangporus baumii]; >QEP49718.1 IoSE [Inonotus obliquus]; >XP\_007269752.1 FmSE [Fomitiporia mediterranea]; >KLO10978.1 SpSE [Schizopora paradoxa]; >KAF8959626.1 FaSE [Flammula alnicola]

>OCB89993.1 LS [Sanghuangporus baumii]; >QEP49720.1 IoLS [Inonotus obliquus]; >KLO19286.1 SpLS [Schizopora paradoxa]; >XP\_027617410.1 ScLS [Sparassis crispa]; >PCH44389.1 WcLS [Wolfiporia cocos]

>OCB87224.1 LSD1 [Sanghuangporus baumii]; >OCB90054.1 LSD2 [Sanghuangporus baumii]; >PAV21443.1 PnLSD [Pyrrhoderma noxium]; >XP\_007263187.1 FmLSD [Fomitiporia mediterranea]; >XP\_001836522.1 CcLSD [Coprinopsis cinerea]; >XP\_036628375.1 PoLSD [Pleurotus ostreatus]

>OCB87985.1 ERG24 [Sanghuangporus baumii]; >XP\_007264907.1 FmERG24 [Fomitiporia mediterranea]; >OAX40973.1 RvERG24 [Rhizopogon vinicolor]; >XP\_041171058.1 SpERG24 [Suillus paluster]



>KAF9267816.1 MfERG24 [Marasmius fiardii]

>OCB84697.1 MESO1 [Sanghuangporus baumii]; >XP\_007262853.1 FmMESO1 [Fomitiporia mediterranea]; >PAV16076.1 PnMESO1 [Pyrrhoderma noxium]; >KLO07398.1 SpMESO1 [Schizopora paradoxa];>XP\_007388216.1 PsMESO1 [Punctularia strigosozonata]

>OCB87751.1 ERG26 [Sanghuangporus baumii]; >XP\_007270754.1 FmERG26 [Fomitiporia mediterranea]; >KLO07614.1 SpERG26 [Schizopora paradoxa]; >PAV17340.1 PnERG26 [Pyrrhoderma noxium]

>TDL22249.1 RmERG26 [Rickenella mellea]

>OCB86242.1 ERG27 [Sanghuangporus baumii]; >KAF8583973.1 RrERG27 [Ramaria rubella]; >XP\_040770639.1 LsERG27 [Laetiporus sulphureus]; >KAF9224357.1 GIERG27 [Gyrodon lividus]; >KAF8485315.1 RoERG27 [Russula ochroleuca]

>OCB86578.1 ERG6 [Sanghuangporus baumii]; >KAF9010079.1 CsERG6 [Cyathus striatus]; >PAV15143.1 PnERG6 [Pyrrhoderma noxium]; >XP\_007384312.1 PsERG6 [Punctularia strigosozonata]; >TDL18780.1 RmERG6 [Rickenella mellea]

>OCB90543.1 ERG2 [Sanghuangporus baumii]; >XP\_007270358.1 FmERG2 [Fomitiporia mediterranea]; >PAV15490.1 PnERG2 [Pyrrhoderma noxium]; >KAF9234931.1 MbERG2 [Melanogaster broomeanus];>XP\_007366653.1 DsERG2 [Dichomitus squalens]

>OCB89410.1 ERG3 [Sanghuangporus baumii]; >KAG2017788.1 CcERG3 [Coprinopsis cinerea]; >XP\_007263262.1 FmERG3 [Fomitiporia mediterranea]; >KAF8235768.1 TmERG3 [Tricholoma matsutake ]; >PCH42137.1 WcERG3 [Wolfiporia cocos]

>OCB85193.1 ERG3 [Sanghuangporus baumii]; >XP\_007265848.1 ERG3 [Fomitiporia mediterranea]; >PAV22239.1 ERG3 [Pyrrhoderma noxium]; >KLO20001.1 ERG3 [Schizopora paradoxa] >KAG2045300.1 ERG3 [Suillus americanus]

>OCB87800.1 ERG4 [Sanghuangporus baumii]; >XP\_007261639.1 FmERG4 [Fomitiporia mediterranea]; >KLO12723.1 SpERG4 [Schizopora paradoxa]; >TDL23613.1 RmERG4 [Rickenella mellea]; >TFK53410.1 HsERG4 [Heliocybe sulcata]

**Table S1.** Primers for qRT-PCR analysis.

| Gene ID          | Primers             | Sequences 5'→3'            |
|------------------|---------------------|----------------------------|
| gene-A7U60_g6623 | HMGS-F              | CGAGAAGACTGCGAGGCGATAC     |
|                  | HMGS-R              | TGGGACTTGAGGGATTGGAGAGG    |
| gene-A7U60_g9137 | HMGR-F              | TGGCTTTGAACGCCGTCTTA       |
|                  | HMGR-R              | CTCTCCATTTTCGTCGCTATCACC   |
| gene-A7U60_g2454 | MVD-F               | TTTCGTATTTCCCGCAAGCCCAG    |
|                  | MVD-R               | GCATTCAGCAAAGCCTCCTCAGC    |
| gene-A7U60_g6678 | IDI-F               | GCTGCTGCGGCGTTTGCTACTAT    |
|                  | IDI-R               | ATCTTCTCGGATGCTCGTTGCTG    |
| gene-A7U60_g4872 | TRIT1-F             | GGAAGGTCCCTCCGTAATCTTGAAA  |
|                  | TRIT1-R             | AAGCGACTGTCCGCAGCCGTG      |
| gene-A7U60_g982  | CYP5340A71-F        | GTCTTACTTGTGGCGGGGTATGAAA  |
|                  | CYP5340A71-R        | ATAGGTTGGGTCCCTGTTAGAAAAT  |
| gene-A7U60_g3826 | GPS-F               | CCCCTACTCCTTCTCATCCATCAA   |
|                  | GPS-R               | GCCGCACCATCTATCACATCATCA   |
| gene-A7U60_g1950 | ABA4-F              | ACAGCAGACGGGAAGTTCTACAAA   |
|                  | ABA4-R              | CTACTGCTCTACCGATGCCACTGT   |
| gene-A7U60_g402  | FPPS-F              | CCGTGGCATTTCGTAACAGAC      |
|                  | FPPS-R              | CAGCAGGGTTGTCCTCTCCGTGT    |
| gene-A7U60_g4753 | GGPS-F              | ATGGTAAATGATAAACTGGTGGTC   |
|                  | GGPS-R              | TTGCTCTGAAGATTGAAATAGTCGT  |
| gene-A7U60_g6423 | CYP512CL1-F         | TTCACACACGCCTTGTTCCACTTAG  |
|                  | CYP512CL1-R         | CGTTCATTCGCTGGCTTTCTTTCA   |
| gene-A7U60_g3573 | SQS-F               | TCCTGCTGCTCATCACACATCCTC   |
|                  | SQS-R               | CCAATAAGTGCCAACATCGCTTCA   |
| gene-A7U60_g5199 | SE-F                | TAAGAACTCGGGGACTGAAACGAAG  |
|                  | SE-R                | CTTGAGAATCGCACCGACGAAGTAG  |
| gene-A7U60_g2849 | LS-F                | ACACAGTTCGCCCTTGAGAGCC     |
|                  | LS-R                | CATCTTCACGGCCCGTTTCGATAGGT |
| gene-A7U60_g5741 | LSD1-F              | CATTGGCTTCCTATTATTGGCTCC   |
|                  | LSD1-R              | GGGTCGTGAAGTGACAATAAGCAT   |
| gene-A7U60_g5073 | ERG26-F             | ACAACAAACAAACGCACTTCCAGC   |
|                  | ERG26-R             | ACACGACGAACACCCGTTGAGAGA   |
|                  | $\alpha$ -tubulin-F | CCAGCAAGCGTTACCGATT        |
|                  | $\alpha$ -tubulin-R | TCCACGACGTCCATCGTTC        |



Table S2. Detected terpenoid metabolites using widely targeted metabolome analyses in *S. baumii*.

| Compounds Name      | CAS       | KEGG ID    | Formula   | EXACT MASS | q1    | q3    | ionmode | retention time | mMyc1       | mMyc2   | mMyc3   | mPri1   | mPri2   | mPri3   | mFru1   | mFru2   | mFru3   |
|---------------------|-----------|------------|-----------|------------|-------|-------|---------|----------------|-------------|---------|---------|---------|---------|---------|---------|---------|---------|
| cis-Zeatin          | 32771-64  | C15545     | C10H13N5O | 219.112    | 220   | 136   | +       | 3.6            | 1043.51     | 2746.34 | 4496.17 | 1932.75 | 2729.55 | 2378.01 | 2538.68 | 1510.04 | 783.406 |
| trans-Zeatin        | 1637-39-  | C00371     | C10H13N5O | 219.112    | 220   | 136   | +       | 3.41           | 4290.886    | 1476.14 | 766.23  | 3548.94 | 2773.33 | 2924.18 | 2898.97 | 1923.15 | 2072.43 |
| (1R)-(-)-Menthyl a  | 2623-23-  | C09870     | C12H22O2  | 198.16198  | 199.2 | 157.2 | +       | 10.4896        | 2676.397999 | 5322.99 | 6521.72 | 8979.62 | 11122.5 | 2328.5  | 11434.2 | 4880.61 | 8782.5  |
| 2,6-Dimethyl-7-oc   | 73815-21- |            | C10H20O3  | 188.141245 | 189.1 | 153.1 | +       | 3.81923        | 2090.377    | 1342.65 | 3577.75 | 4040.21 | 2205.35 | 1958.54 | 4437.54 | 2477.93 | 2532.42 |
| Bornyl acetate      | 5655-61-  | C09837     | C12H20O2  | 196.14633  | 197.2 | 137.1 | +       | 6.54107        | 2046.667    | 4733.35 | 1655.81 | 7947.95 | 3378.97 | 11572.7 | 6230.3  | 4192.13 | 8128.07 |
| Cantharidin         | 56-25-7   | C16778     | C10H12O4  | 196.07356  | 197.1 | 95.1  | +       | 6.0265         | 12312.6725  | 2407.75 | 6387.58 | 5361.25 | 5143.84 | 12961.9 | 8594.33 | 10559.8 | 11032.8 |
| Carvacryl acetate   | 6380-28-  | -          | C12H16O2  | 192.11503  | 193.1 | 133.1 | +       | 11.228         | 16310.433   | 10257.4 | 13412.2 | 14863.7 | 17038.1 | 4382.3  | 13376.6 | 14015   | 12105.7 |
| Citronellyl acetate | 141-11-7  | C12298     | C12H22O2  | 198.16198  | 199.2 | 55.1  | +       | 10.4819        | 8030.282998 | 11387.9 | 5232.13 | 5739.2  | 8022.72 | 12756.9 | 5872.24 | 9087    | 4234.64 |
| Isopulegol          | 7786-67-6 | 89-79-2    | C10H18O   | 154.135765 | 155.1 | 137.1 | +       | 2.46032        | 34932.775   | 30176.4 | 26908.3 | 10790.5 | 5163.16 | 5399.65 | 5839.51 | 5558.77 | 3554.93 |
| Nerylacetate        | 141-12-8  | -          | C12H20O2  | 196.14633  | 219.1 | 81.1  | +       | 8.37492        | 7464.543    | 4327.62 | 5929.25 | 11315.6 | 7117.6  | 14434.1 | 10838.9 | 16975.1 | 5866.27 |
| p-Cymene            | 99-87-6   | C06575     | C10H14    | 134.10955  | 135.1 | 93.1  | +       | 11.6207        | 39572.09649 | 25754.2 | 24573.3 | 29834.2 | 13039.7 | 25883.6 | 12338   | 41511.7 | 13133.9 |
| Picrocrocin         | 138-55-6  | C17055     | C16H26O7  | 330.167855 | 331.2 | 151.1 | +       | 9.24762        | 774.1695    | 1248.31 | 2716.96 | 9805.08 | 4498.09 | 2584.35 | 1040.36 | 3154.36 | 1277.27 |
| Terpinine-4-ol      | 562-74-3  | C17073     | C10H18O   | 154.135765 | 154.1 | 43    | +       | 5.45468        | 8779.376    | 10991.3 | 9731.99 | 9568.57 | 4916.34 | 28781.4 | 14314.8 | 13256.2 | 10932.4 |
| Terpinolene         | 586-62-9  | C06075     | C10H16    | 136.1252   | 136.1 | 93.1  | +       | 10.5735        | 23040.96749 | 23261.6 | 24260   | 13089.9 | 18515.4 | 17993.6 | 14307.4 | 29323.9 | 12577.9 |
| Abscisic acid       | 21293-29  | C06082,C11 | C15H20O4  | 264.13616  | 265.1 | 247.1 | +       | 7.86           | 1449.756    | 1931.74 | 1669.8  | 1525.28 | 2728.2  | 3321.85 | 11957.7 | 5926.4  | 11749.3 |
| Alantolactone       | 546-43-0  | C09289     | C15H20O2  | 232.14633  | 233.2 | 105.1 | +       | 11.9329        | 25788.6805  | 23531.9 | 28362.8 | 23690.6 | 23737.9 | 26668.4 | 41493.9 | 64414.7 | 46416.5 |
| Alpha-caryophyll    | 6753-98-  | C09684     | C15H24    | 204.1878   | 205.2 | 81.1  | +       | 11.581         | 26155.0205  | 43268.8 | 31565.3 | 21268.3 | 27453.8 | 11692.8 | 34163.5 | 38182.8 | 45286   |
| alpha-Cyperone      | 473-08-5  | C17090     | C15H22O   | 218.167065 | 219.2 | 67.1  | +       | 12.2018        | 86135.845   | 42215.4 | 36972.9 | 47311.6 | 48285.1 | 36013.3 | 294582  | 130183  | 254447  |
| Alpha-Santonin      | 481-06-1  | C02206     | C15H18O3  | 246.125595 | 247.1 | 173.1 | +       | 7.86777        | 12563.7855  | 7283.96 | 8550.43 | 15421.5 | 10288.4 | 11216.8 | 8337.57 | 17488.3 | 14756.4 |
| Anisatin            | 5230-87-  | C09294     | C15H20O8  | 328.11582  | 329.1 | 311.1 | +       | 5.42288        | -           | 7657.68 | 2118.35 | 3766.23 | -       | 6791.81 | 10190.1 | 2229    | 3981.14 |
| Artemisinin         | 63968-64  | C09538     | C15H22O5  | 282.146725 | 283.2 | 110.1 | +       | 13.0238        | 204397.6715 | 167578  | 181010  | 254880  | 292914  | 168293  | 171513  | 133280  | 149300  |
| beta-Costic acid    | 3650-43-  | -          | C15H22O2  | 234.16198  | 235.2 | 189.2 | +       | 8.89518        | 4539.213    | 7108.36 | 4750.23 | 3675.88 | 9631.33 | 12161.4 | 2048.59 | 7545.86 | 4815.52 |
| Bisabolol oxide A   | 22567-36  | C16773     | C15H26O2  | 238.19328  | 239.2 | 55.1  | +       | 11.4953        | 75627.36051 | 46864.9 | 78679.7 | 80813.2 | 50083.3 | 54492.1 | 62189.6 | 82787.5 | 59393.1 |
| Catalpalactone      | 1585-68-  | C16929     | C15H14O4  | 258.08921  | 259.1 | 67.1  | +       | 12.8392        | 2596.440001 | 6210.18 | 8500.73 | 2559.68 | 3752.99 | 2984.43 | 4185.92 | 7291.48 | 5155.83 |
| Costunolide         | 553-21-9  | C09382     | C15H20O2  | 232.14633  | 233.2 | 161.1 | +       | 12.2077        | 5718.183    | 16060.6 | 15376.5 | 2459    | 8707.04 | 13583.6 | 19367   | 7139.22 | 7948.59 |
| Cryptomeridiol      | 4666-84-  | C17676     | C15H28O2  | 240.20893  | 241.2 | 223.2 | +       | 3.23935        | 1205.2035   | 2926.34 | 1418.9  | 2955.78 | 4879.17 | 4489.31 | 5113.8  | 746.045 | 2532.16 |
| Curzerene           | 17910-09- | -          | C15H20O   | 216.151415 | 217.2 | 55.1  | +       | 2.54623        | 6776.381    | 7016.13 | 34304.9 | 7758.25 | 17814   | 13741.8 | 13188.7 | 7169.92 | 5948.53 |
| Epitulpinolide      | 24164-13  | C09566     | C17H22O4  | 290.15181  | 291.2 | 231.1 | +       | 5.06868        | 2823.0645   | 595.404 | -       | 5461.84 | 3075.61 | 5037.96 | 2427.39 | 1846    | 3997.1  |
| Eupatolide          | 6750-23-  | C09440     | C15H20O3  | 248.141245 | 249.1 | 231.1 | +       | 7.17532        | 486.588     | 1485.54 | 4759.4  | 1600.63 | 1569.43 | 1657.84 | 4848.07 | 2335.49 | 1034.45 |
| Isoalantolactone    | 470-17-7  | C09484     | C15H20O2  | 232.14633  | 233.2 | 105.1 | +       | 12.3094        | 20204.9525  | 17258.4 | 8250.19 | 11871.2 | 14077.6 | 10610.5 | 13097.8 | 11925.1 | 26269.5 |
| Lactupicrin         | 65725-11  | C09490     | C23H22O7  | 410.136555 | 411.1 | 259.1 | +       | 13.7958        | 2315.868499 | 1930.41 | 3649.37 | 9938.35 | 5408.67 | 994.663 | 4823.8  | 2566.12 | 2112.93 |
| Linderalactone      | 728-61-0  | C17425     | C15H16O3  | 244.109945 | 245.1 | 199.1 | +       | 8.73737        | 3744.7345   | 5662.77 | 7828.22 | 4082.97 | 1110.56 | 4371.48 | 3222    | 2542.66 | 1713.66 |
| Pterosin D          | 34169-70- | -          | C15H20O3  | 248.141245 | 249.1 | 231.1 | +       | 3.2902         | 3091.383    | 10803.7 | 1635.58 | 2963.07 | 717.111 | 7917.4  | 3556.58 | 2955.47 | 2532.16 |
| Pyrocurzerenone     | 20013-75- | -          | C15H16O   | 212.120115 | 213.1 | 171.1 | +       | 3.42397        | 655.752     | 1467.13 | 2468.2  | 633.264 | 1921.76 | 1963.76 | 1669.15 | 3340.8  | 1153.35 |
| Tenulin             | 19202-92  | C09557     | C17H22O5  | 306.146725 | 307.2 | 289.1 | +       | 4.22953        | 1177.922    | 3081.92 | 2411.8  | 934.032 | 957.386 | 8437.58 | 4144.54 | 2561.95 | 2511.58 |
| trans-Caryophyll    | 87-44-5   | C09629     | C15H24    | 204.1878   | 205.2 | 95.1  | +       | 12.1185        | 29115.75499 | 35357.4 | 31663.5 | 21225.8 | 43785.9 | 13016   | 134669  | 58124.7 | 118807  |
| Valerenic acid      | 3569-10-  | C09743     | C15H22O2  | 234.16198  | 235.2 | 161.1 | +       | 11.2448        | 19685.6415  | 3997    | 20300   | 15722.9 | 10903.5 | 10100.9 | 14684.8 | 22095.9 | 29091.3 |
| Gibberellin A4      | 468-44-0  | C11864     | C19H24O5  | 332.1624   | 331   | 243   | -       | 9.98           | 881.699     | 702.217 | 1672.71 | 1082.03 | 2209.49 | 1256.15 | 1299.2  | 1353.74 | 1322.1  |
| (+)-Glaucarubinone  | 1259-86-  | C08763     | C25H34O10 | 494.2152   | 495.2 | 477.2 | +       | 5.79035        | 1729.242    | 3534.51 | -       | 2328.96 | 5286.77 | 13173.9 | 6980.2  | 3760.12 | 2805.24 |
| 6,7-Dehydroferrug   | 34539-84- | -          | C20H28O   | 284.214015 | 285.2 | 269.2 | +       | 9.06125        | 11835.9695  | 5007.89 | 17128.3 | 19267.7 | 15131.1 | 9865.96 | 9157.35 | 8221.14 | 8205.82 |
| Abietic acid        | 514-10-3  | C06087     | C20H30O2  | 302.22458  | 303.2 | 285.2 | +       | 5.20292        | 5654.0975   | 17453.1 | 18707.1 | 6074.63 | 4638.37 | 13231.7 | 5416.34 | 5376    | 4790.33 |
| Alantnone           | 981-15-7  | C08747     | C20H24O7  | 376.152205 | 377.2 | 359.1 | +       | 3.68698        | 2728.745    | 1799.33 | 1960.29 | 1679.13 | 4377.9  | 1806.6  | 924.903 | 1483.68 | 2920.07 |
| Bruceine D          | 21499-66  | C08752     | C20H26O9  | 410.157685 | 411.2 | 393.2 | +       | 4.83543        | 3284.301    | 960.918 | 508.407 | 5749.07 | 2782.2  | 36767.8 | 10673.7 | 9948.8  | 15703.9 |
| Cafestol            | 469-83-0  | C09066     | C20H28O3  | 316.203845 | 317.2 | 281.2 | +       | 5.47147        | 1567.223    | 2060.46 | -       | 1032.46 | 538.16  | 8957.09 | 2166.7  | 4291.9  | 1039.43 |
| Carnosol            | 5957-80-  | C09069     | C20H26O4  | 330.18311  | 329.2 | 285.2 | -       | 12.147         | 1161.526001 | 751.237 | -       | 1567.26 | 1400.17 | 2427.42 | 1322.15 | 1805.74 | 1336.47 |
| Diosbulbin D        | 66756-57- | -          | C19H20O6  | 344.12599  | 345.1 | 327.1 | +       | 2.6289         | 1015.56     | 2048.42 | 3430.96 | 2790.65 | 2282.96 | 7277.72 | 3118.94 | 4927.36 | 2950.51 |
| ent-16beta,17-dihy  | 55483-24- | -          | C20H30O4  | 334.21441  | 335.2 | 271.2 | +       | 7.14977        | 1136.1025   | 1029.89 | 761.176 | 1348.54 | 2056.98 | 7097.24 | 4364.34 | 2249.56 | 6468.05 |
| Eurycomalactone     | 23062-24  | C08759     | C19H24O6  | 348.15729  | 349.2 | 331.2 | +       | 5.79035        | 2185.0175   | 2263.12 | 2855.74 | 5480.83 | 5992.9  | 12167.7 | 5790.83 | 7180.84 | 1369.04 |
| Goshonoside F1      | 90851-24- | -          | C26H44O8  | 484.30362  | 485.3 | 449.3 | +       | 12.3021        | -           | -       | 11098.1 | 14485.8 | 7230.62 | 6047.41 | 5421.55 | -       | 4757    |
| Kaurenoic acid      | 6730-83-  | C11874     | C20H30O2  | 302.22458  | 303.2 | 257.2 | +       | 5.90232        | -           | 1824.87 | -       | 1408.81 | 79448.8 | 54079.2 | 4762.61 | 6202.2  | 3412.04 |
| Kirenol             | 52659-56- | -          | C20H34O4  | 338.24571  | 321.2 | 81.1  | +       | 13.158         | 236324.4471 | 298191  | 302235  | 317905  | 336970  | 293424  | 260835  | 341036  | 272756  |
| Lathyril            | 34420-19  | C09125     | C20H30O4  | 334.21441  | 335.2 | 317.2 | +       | 7.14977        | 1000.818    | 1545.84 | 1760.98 | 3491.46 | 6299.73 | 8814.79 | 6550.61 | 5850.19 | 4959.81 |
| Methyl tanshinona   | 18887-19- | -          | C20H18O5  | 338.115425 | 339.1 | 171.1 | +       | 11.4294        | 5627.605501 | 2859.95 | 13537.9 | 6721.5  | 7007.97 | -       | 5626.75 | 2042    | 2914.39 |
| Mevastatin          | 73573-88  | C13963     | C23H34O5  | 390.240625 | 391.2 | 185.1 | +       | 12.0672        | 8410.5      | 25311.9 | 26475.7 | 22654.7 | 28872   | 26733.7 | 15315.4 | 22775.5 | 13767.1 |
| Miltirone           | 27210-57  | C13715     | C19H22O2  | 282.16198  | 283.2 | 55.1  | +       | 12.9769        | 1253881.584 | 1626497 | 1456219 | 2042345 | 2009322 | 1196884 | 947023  | 1339745 | 1149932 |
| Sterebin A          | 107647-1- | -          | C18H30O4  | 310.21441  | 311.2 | 293.2 | +       | 11.7548        | 243260.6951 | 524795  | 1065600 | 122048  | 169697  | 85995.4 | 60845.5 | 45643.5 | 32822.5 |
| Sterebin E          | 114343-7- | -          | C20H34O4  | 338.24571  | 339.3 | 303.2 | +       | 13.1931        | 5772.096001 | 3763.07 | 8685.31 | 7484.95 | 114946  | 8911.68 | 3394.33 | 3281.9  | 4873.98 |
| Tripdiolide         | 38647-10  | C09202     | C20H24O7  | 376.152205 | 377.2 | 359.1 | +       | 5.13582        | 2402.7325   | 1190.6  | 5898.8  | 9167.17 | 6913.23 | 11959.5 | 4667.51 | 7720    | 4268.98 |
| 11-Keto-beta-bosw   | 17019-92- | -          | C30H46O4  | 470.33961  | 471.3 | 453.3 | +       | 9.23923        | 172545.9365 | 5985.05 | 4002.15 | 72118.1 | 37260.8 | 72571   | 7254.28 | 14494.3 | 9793.12 |
| Alisol A            | 19885-10  | C17459     | C30H50O5  | 490.365825 | 473.4 |       |         |                |             |         |         |         |         |         |         |         |         |



**Table S3.** RNA-Seq data statistics of *S. baumii*.

| Sample | Clean paired reads | Raw data (G) | Clean bases(G) | Q20(%) | Q30(%) | GC content(%) | Clean data ratio(%) |
|--------|--------------------|--------------|----------------|--------|--------|---------------|---------------------|
| Myc1   | 25565929           | 8.18         | 7.35           | 98.86  | 95.6   | 52.85         | 89.78               |
| Myc2   | 24585033           | 8.17         | 7.07           | 98.74  | 95.25  | 52.41         | 86.6                |
| Myc3   | 23749939           | 7.91         | 6.7            | 98.76  | 95.29  | 52.51         | 84.71               |
| Pri1   | 26543637           | 8.73         | 7.74           | 98.7   | 95.11  | 51.62         | 88.65               |
| Pri2   | 26056966           | 8.64         | 7.59           | 98.73  | 95.2   | 51.71         | 87.93               |
| Pri3   | 25497703           | 8.41         | 7.44           | 98.7   | 95.1   | 52.2          | 88.47               |
| Fru1   | 21320787           | 7.01         | 6.29           | 98.74  | 95.26  | 51.81         | 89.8                |
| Fru2   | 20986001           | 6.93         | 6.19           | 98.71  | 95.15  | 51.76         | 89.36               |
| Fru3   | 18889143           | 6.28         | 5.57           | 98.64  | 94.94  | 51.87         | 88.79               |

**Table S4.** Terpenoid synthesis genes were annotated in KEGG.

| ko_ID   | ko_Annotation                                 | Class      | Gene_Number | Gene_ID                                                                                                                                                                                                                                                                                                                                                                                                                                  |
|---------|-----------------------------------------------|------------|-------------|------------------------------------------------------------------------------------------------------------------------------------------------------------------------------------------------------------------------------------------------------------------------------------------------------------------------------------------------------------------------------------------------------------------------------------------|
| ko00900 | Terpenoid backbone biosynthesis               | Metabolism | 21          | gene-A7U60_g4165; gene-A7U60_g6678;<br>gene-A7U60_g6774; gene-A7U60_g3991;<br>gene-A7U60_g1906; gene-A7U60_g5051;<br>gene-A7U60_g5414; gene-A7U60_g5285;<br>gene-A7U60_g2533; gene-A7U60_g6282;<br>gene-A7U60_g3826; gene-A7U60_g6623;<br>gene-A7U60_g9137; gene-A7U60_g3101;<br>gene-A7U60_g3827; gene-A7U60_g9141;<br>gene-A7U60_g402; gene-A7U60_g6278;<br>gene-A7U60_g2454; gene-A7U60_g4753;<br>gene-A7U60_g7915                    |
| ko00904 | Diterpenoid biosynthesis                      | Metabolism | 8           | gene-A7U60_g2010; gene-A7U60_g3030;<br>gene-A7U60_g285; gene-A7U60_g6428;<br>gene-A7U60_g6496; gene-A7U60_g3505;<br>gene-A7U60_g6424; gene-A7U60_g6423                                                                                                                                                                                                                                                                                   |
| ko00908 | Zeatin biosynthesis                           | Metabolism | 1           | gene-A7U60_g4872                                                                                                                                                                                                                                                                                                                                                                                                                         |
| ko00909 | Sesquiterpenoid and triterpenoid biosynthesis | Metabolism | 5           | gene-A7U60_g5199; gene-A7U60_g4830;<br>gene-A7U60_g5118; gene-A7U60_g1440;<br>gene-A7U60_g3573                                                                                                                                                                                                                                                                                                                                           |
| ko00100 | Steroid biosynthesis                          | Metabolism | 22          | gene-A7U60_g2221; gene-A7U60_g3386;<br>gene-A7U60_g8217; gene-A7U60_g4943;<br>gene-A7U60_g1239; gene-A7U60_g2849;<br>gene-A7U60_g6749; gene-A7U60_g6315;<br>gene-A7U60_g5073; gene-A7U60_g5199;<br>gene-A7U60_g6255; gene-A7U60_g3232;<br>gene-A7U60_g3573; gene-A7U60_g2718;<br>gene-A7U60_g3496; gene-A7U60_g3495;<br>gene-A7U60_g5741; gene-A7U60_g5123;<br>gene-A7U60_g4198; gene-A7U60_g7819;<br>gene-A7U60_g6571; gene-A7U60_g1788 |

**Table S5.** Transcript abundance of terpenoid synthesis genes as per the *S. baumii* transcriptome data annotation.

| Pathway                         | Gene name  | Kegg entry | Gene bank accession ID | EC.No.                    | Read in Myc | Read in Pri | Read in Fru | FPKM Myc | FPKM Pri | FPKM Fru |
|---------------------------------|------------|------------|------------------------|---------------------------|-------------|-------------|-------------|----------|----------|----------|
| Terpenoid backbone biosynthesis | AACT       | K00626     | OCB87509.1             | 2.3.1.9                   | 2077        | 2707        | 943.333     | 181.13   | 291.09   | 233.195  |
|                                 | HMGS       | K01641     | OCB86311.1             | 2.3.3.10                  | 1803        | 495.667     | 2541.67     | 127.78   | 43.5867  | 293.377  |
|                                 | HMGR       | K00021     | OCB83928.1             | 1.1.1.34                  | 5469.67     | 1198.33     | 6631.33     | 124.897  | 32.9667  | 212.492  |
|                                 | MVK        | K00869     | OCB84761.1             | 2.7.1.36                  | 2268.33     | 3445        | 2512        | 82.8033  | 150.257  | 102.143  |
|                                 | PMK        | K00938     | OCB89752.1             | 2.7.4.2                   | 562         | 1293.33     | 375.333     | 39.2     | 109.487  | 152.068  |
|                                 | MVD        | K01597     | OCB90355.1             | 4.1.1.33                  | 1958        | 3035        | 1588.33     | 180.317  | 346.4    | 163.44   |
| cis-Zeatin                      | IDI        | K01823     | OCB86091.1             | 5.3.3.2                   | 2755        | 1045.33     | 239         | 435.713  | 209.61   | 49.0183  |
|                                 | TRIT1      | K00791     | OCB88085.1             | 2.5.1.75                  | 871.333     | 1092        | 306.667     | 49.74    | 73.4367  | 14.9683  |
| trans-Zeatin                    | CYP5340A71 | K10717     | OCB91754.1             | -                         | 135.667     | 234         | 0.33333     | 9.61333  | 19.7033  | 0.39667  |
|                                 | CYP5340A72 | K10717     | OCB92139.1             | -                         | 397.333     | 824.333     | 6.33333     | 27.5933  | 67.0833  | 22.335   |
| Monoterpenoid                   | GPS        | K14066     | OCB89018.1             | 2.5.1.1                   | 746         | 169         | 385.667     | 47.64    | 13.16    | 70.8917  |
| Sesquiterpenoid                 | FPPS       | K00787     | OCB92206.1             | 2.5.1.10                  | 629         | 4960.33     | 510.667     | 68.0733  | 676.567  | 1223.23  |
|                                 | ABA4       | -          | OCB90839.1             | -                         | 432.667     | 1220        | 10093.3     | 57.4333  | 201.49   | 1186.23  |
| Diterpenoid                     | GGPS       | K13789     | OCB88125.1             | 2.5.1.29                  | 65.3333     | 107         | 104         | 8.46     | 17.1533  | 66.205   |
|                                 | CYP512CL1  | K04122     | OCB86527.1             | 1.14.14.86                | 201         | 50.6667     | 928         | 13.8833  | 4.06     | 58.2633  |
|                                 | CYP512CL2  | K04122     | OCB86532.1             | 1.14.14.86                | 294         | 309.333     | 107         | 12.21    | 15.61    | 4.68167  |
|                                 | CYP512CL3  | K04122     | OCB86528.1             | 1.14.14.86                | 59.6667     | 330.333     | 11.3333     | 4.05333  | 26.61    | 1.38167  |
| Triterpenoid                    | CYP512CM1  | K04123     | OCB90766.1             | 1.14.14.107               | 73.6667     | 229.667     | 11.6667     | 5.16333  | 18.4667  | 10.8367  |
|                                 | SQS        | K00801     | OCB89274.1             | 2.5.1.21                  | 1623.67     | 1324.67     | 160.333     | 117.857  | 118.877  | 59.5183  |
|                                 | SE         | K00511     | OCB87673.1             | 1.14.14.17                | 2180        | 1053.67     | 580.667     | 208.76   | 126.193  | 67.6717  |
| Steroid                         | LS         | K01852     | OCB89993.1             | 5.4.99.7                  | 816.667     | 573.667     | 602.667     | 27.9767  | 23.9533  | 22.66    |
|                                 | LSD1       | K05917     | OCB87224.1             | 1.14.14.154<br>1.14.15.36 | 660.667     | 75.3333     | 83.3333     | 39.0133  | 5.40667  | 44.1067  |
|                                 | LSD2       | K05917     | OCB90054.1             | 1.14.14.154<br>1.14.15.36 | 784         | 649.667     | 719.667     | 49.22    | 49.86    | 306.492  |
|                                 | ERG24      | K00222     | OCB87985.1             | 1.3.1.70                  | 952.333     | 1931        | 3695        | 79.39    | 196.74   | 272.807  |
|                                 | MESO1      | K07750     | OCB84697.1             | 1.14.18.9                 | 1059.67     | 99.3333     | 58          | 122.737  | 14.65    | 95.7983  |
|                                 | ERG26      | K07748     | OCB87751.1             | 1.1.1.170                 | 451.667     | 1049.67     | 1244.33     | 36.9767  | 105.927  | 96.9867  |
|                                 | ERG27      | K09827     | OCB86242.1             | 1.1.1.270                 | 452.333     | 1058.33     | 280.333     | 13.6367  | 37.8133  | 45.89    |
|                                 | ERG6       | K00559     | OCB86578.1             | 2.1.1.41                  | 1748.67     | 1710.67     | 371.333     | 202.547  | 251.237  | 158.158  |
|                                 | ERG2       | K09829     | OCB90543.1             | 5.-.-.-                   | 845.333     | 1559.33     | 745.667     | 149.507  | 357.767  | 240.75   |
|                                 | ERG3       | K00227     | OCB89410.1             | 1.14.19.20                | 1767        | 1582        | 2627.67     | 92.4333  | 101.717  | 156.515  |
|                                 | ERG5       | K09831     | OCB85193.1             | 1.14.19.41                | 1885        | 527.667     | 596         | 124.89   | 44.23    | 65.39    |
|                                 | ERG4       | K00223     | OCB87800.1             | 1.3.1.71                  | 2574        | 1827.67     | 451         | 198.02   | 168.163  | 60.22    |

(1). Assay procedure for ABA and GA4

1. Addition of standard: Set standard wells and sample wells, and add 50  $\mu\text{L}$  of standard with different concentrations to each standard well.
2. Add sample: set up blank wells (the blank control wells do not add samples and enzyme labeling reagents, and the other steps are the same) and the wells for the samples to be tested. Add 40  $\mu\text{L}$  of sample diluent to the well of the sample to be tested on the enzyme-labeled coating plate, and then add 10  $\mu\text{L}$  of the sample to be tested (the final dilution of the sample is 5 times). Add the sample to the bottom of the well of the microtiter plate, try not to touch the wall of the well, and shake gently to mix.
3. Add enzyme: Add 100  $\mu\text{L}$  of enzyme labeling reagent to each well, except for blank wells.
4. Incubation: Cover the plate with sealing film and incubate at 37°C for 60 min.
5. Liquid preparation: Dilute the 20-fold concentrated washing solution with distilled water 20-fold for later use.
6. Washing: Carefully peel off the sealing film, discard the liquid, spin dry, fill each well with washing liquid, let it stand for 30 s, and then discard, repeat 5 times, and pat dry.
7. Color development: first add 50  $\mu\text{L}$  of color developer A to each well, then add 50  $\mu\text{L}$  of color developer B, gently shake and mix, and develop color at 37°C for 15 min in the dark.
8. Termination: Add 50  $\mu\text{L}$  of stop solution to each well to stop the reaction (the blue turns to yellow at this time).
9. Determination: Zero the blank well, and measure the absorbance (OD value) of each well in sequence at 450 nm wavelength. The measurement should be performed within 15 min after adding the stop solution.

(2). Assay procedure for CZ and TZ

1. Add sample: Set up blank wells (the blank control wells do not add samples and enzyme labeling reagents, and the other steps are the same), standard wells, and sample wells to be tested. Accurately add 50  $\mu\text{L}$  of the standard to the standard wells, add 40  $\mu\text{L}$  of the sample diluent to the well of the sample to be tested, and then add 10  $\mu\text{L}$  of the sample to be tested (the final dilution of the sample is 5 times). Add the sample to the bottom of the well of the microtiter plate, try not to touch the wall of the well, and shake gently to mix.
2. Incubation: Cover the plate with sealing film and incubate at 37°C for 30 min.
3. Dosing: Dilute the 30-fold concentrated washing solution with distilled water 30-fold for later use
4. Washing: Carefully peel off the sealing film, discard the liquid, spin dry, fill each well with washing solution, let it stand for 30 s, and then discard, repeat 5 times, and pat dry.
5. Add enzyme: Add 50  $\mu\text{L}$  of enzyme labeling reagent to each well, except for blank wells.
6. Incubation: The operation is the same as 2.
7. Washing: the operation is the same as 4.
8. Color development: First add 50  $\mu\text{L}$  of color developer A to each well, then add 50  $\mu\text{L}$  of color developer B, gently shake and mix, and let the color develop at 37°C for 10 min in the dark.
9. Termination: Add 50  $\mu\text{L}$  of stop solution to each well to stop the reaction (the blue turns to yellow immediately).
10. Determination: Zero the blank well, and measure the absorbance (OD value) of each well in sequence at 450 nm wavelength. The measurement should be performed within 15 min after adding the stop solution.
